# Supplementary material
Source: HighWire-hosted journal article supplement (http://bmjleader.bmj.com/highwire/filestream/2473/field_highwire_adjunct_files/3/leader-2021-000566supp004_data_supplement.pdf)
Supplement: leader-2021-000566supp004_data_supplement.pdf [file leader-2021-000566supp004_data_supplement.pdf]

Questions/topic guide. From January 2021 onwards.

Role and responsibilities, general and RECOVERY.

How have the **pressures** on the Trust altered across the timeline of the COVID-19 pandemic?

How has this **affected the priorities**/prioritisation/emphasis.

What or who **drove recruitment**.

Who **led on recruitment**, medical staff or research nurses? Model ?

What were/are the **barriers to** recruitment.

How have **they changed**

**Competing interests?**

**What learning was** there from the first wave that has been used in the second and subsequent waves?

What do you think about the processes of **RECOVERY study?**

How have **the changes to the RECOVERY study impacted on recruitment?**

Have any **patients asked** directly to be entered onto a research study.

How does it make you **feel being part of UPH** research.

Any other factors that have affected recruitment to the RECOVERY study that have not been touched on?

Thanks.
